# Supplementary material
Source: MDPI journal article supplement (https://www.mdpi.com/2073-4395/11/7/1387)
Supplement: s1 [file s1]

**Table S1.** Pearson correlation coefficients (under the diagonal) and probabilities (over the diagonal) for soil physicochemical properties measured in the study. In bold, significant probabilities ( $p \leq 0.05$ ). In italics, correlation coefficients for which probabilities are significant.

| Soil property                  | Clay (%)      | Sand (%)      | pH            | C (%)         | N (%)         | P (mg·kg <sup>-1</sup> ) | Ca (mg·kg <sup>-1</sup> ) | Mg (mg·kg <sup>-1</sup> ) | K (mg·kg <sup>-1</sup> ) | Na (mg·kg <sup>-1</sup> ) | Al (%)       | CaCO <sub>3</sub> (%) | CEC (meq·100 g <sup>-1</sup> ) |
|--------------------------------|---------------|---------------|---------------|---------------|---------------|--------------------------|---------------------------|---------------------------|--------------------------|---------------------------|--------------|-----------------------|--------------------------------|
| Clay (%)                       | -             | <b>0.000</b>  | <b>0.001</b>  | <b>0.000</b>  | <b>0.018</b>  | 0.211                    | 0.095                     | 0.083                     | 0.199                    | 0.383                     | <b>0.006</b> | <b>0.009</b>          | 0.959                          |
| Sand (%)                       | <i>-0.913</i> | -             | <b>0.002</b>  | <b>0.000</b>  | <b>0.022</b>  | 0.717                    | 0.245                     | 0.173                     | 0.357                    | 0.699                     | <b>0.007</b> | <b>0.006</b>          | 0.840                          |
| pH                             | <i>0.744</i>  | <i>-0.709</i> | -             | <b>0.000</b>  | <b>0.002</b>  | <b>0.047</b>             | <b>0.012</b>              | <b>0.024</b>              | 0.131                    | 0.198                     | <b>0.000</b> | <b>0.001</b>          | 0.901                          |
| C (%)                          | <i>-0.846</i> | <i>0.829</i>  | <i>-0.771</i> | -             | <b>0.028</b>  | 0.182                    | <b>0.016</b>              | <b>0.037</b>              | 0.084                    | 0.317                     | <b>0.019</b> | <b>0.011</b>          | 0.372                          |
| N (%)                          | <i>0.582</i>  | <i>-0.568</i> | <i>0.715</i>  | <i>-0.548</i> | -             | 0.113                    | <b>0.033</b>              | <b>0.008</b>              | <b>0.043</b>             | 0.339                     | <b>0.004</b> | <b>0.002</b>          | 0.693                          |
| P (mg·kg <sup>-1</sup> )       | <i>-0.331</i> | 0.098         | <i>-0.503</i> | 0.352         | <i>-0.412</i> | -                        | <b>0.023</b>              | 0.076                     | 0.142                    | 0.123                     | 0.092        | 0.271                 | 0.291                          |
| Ca (mg·kg <sup>-1</sup> )      | <i>-0.431</i> | 0.308         | <i>-0.611</i> | <i>0.589</i>  | <i>-0.534</i> | <i>0.563</i>             | -                         | <b>0.000</b>              | <b>0.005</b>             | <b>0.046</b>              | 0.072        | <b>0.011</b>          | <b>0.042</b>                   |
| Mg (mg·kg <sup>-1</sup> )      | <i>-0.446</i> | 0.358         | <i>-0.559</i> | <i>0.525</i>  | <i>-0.640</i> | 0.455                    | <i>0.789</i>              | -                         | <b>0.000</b>             | <b>0.032</b>              | 0.059        | <b>0.009</b>          | 0.135                          |
| K (mg·kg <sup>-1</sup> )       | <i>-0.339</i> | 0.247         | <i>-0.394</i> | 0.446         | <i>-0.512</i> | 0.384                    | <i>0.663</i>              | <i>0.794</i>              | -                        | <b>0.005</b>              | 0.264        | 0.086                 | 0.052                          |
| Na (mg·kg <sup>-1</sup> )      | <i>-0.234</i> | 0.105         | <i>-0.340</i> | 0.267         | <i>-0.256</i> | 0.401                    | <i>0.504</i>              | <i>0.538</i>              | <i>0.670</i>             | -                         | 0.373        | 0.383                 | <b>0.042</b>                   |
| AL (%)                         | <i>0.654</i>  | <i>-0.645</i> | <i>0.858</i>  | <i>-0.580</i> | <i>0.681</i>  | <i>-0.435</i>            | <i>-0.461</i>             | <i>-0.482</i>             | <i>-0.297</i>            | <i>-0.239</i>             | -            | <b>0.000</b>          | 0.542                          |
| CaCO <sub>3</sub> (%)          | <i>0.632</i>  | <i>-0.658</i> | <i>0.755</i>  | <i>-0.618</i> | <i>0.723</i>  | <i>-0.293</i>            | <i>-0.618</i>             | <i>-0.630</i>             | <i>-0.442</i>            | <i>-0.234</i>             | <i>0.831</i> | -                     | 0.930                          |
| CEC (meq·100 g <sup>-1</sup> ) | <i>-0.014</i> | <i>-0.055</i> | <i>-0.034</i> | 0.239         | 0.107         | 0.281                    | <i>0.514</i>              | 0.390                     | 0.494                    | <i>0.513</i>              | 0.165        | 0.024                 | -                              |
